# Supplementary material
Source: PubMed Central journal article supplement (PMC4130275)
Supplement: hvi-10-536-s01.pdf [file hvi-10-536-s01.pdf]

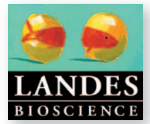

## **Supplemental Material to:**

**Marion Debin, Vittoria Colizza, Thierry Blanchon, Thomas Hanslik, Clement Turbelin, and Alessandra Falchi**

**Effectiveness of 2012–2013 influenza vaccine against influenza-like illness in general population: Estimation in a French web-based cohort**

**Human Vaccines & Immunotherapeutics 2013; 10(3)  
<http://dx.doi.org/10.4161/hv.27439>**

**[www.landesbioscience.com/journals/vaccines/article/27439](http://www.landesbioscience.com/journals/vaccines/article/27439)**

**Effectiveness of 2012-2013 influenza vaccine against influenza-like illness in general population: estimation in a French web-based cohort**

M. Debin, T. Blanchon, V. Colizza, T. Hanslik, C. Turbelin, A. Falchi

**Supplementary Material**

**Supplementary Table S1** – List of the indicators gathered in the questionnaires

| <b>Intake questionnaire</b>                                            | <b>Weekly questionnaire</b>                                                                                                                                                                                                                                                                                      |
|------------------------------------------------------------------------|------------------------------------------------------------------------------------------------------------------------------------------------------------------------------------------------------------------------------------------------------------------------------------------------------------------|
| Gender                                                                 | List of registered symptoms: No symptom / Fever / Chills / Runny or blocked nose / Sneezing / Sore throat / Cough / Shortness of breath / Headache / Muscle or joint pain / Chest pain / Feeling tired / Loss of appetite / Coloured sputum / Watery eyes / Nausea / Vomiting / Diarrhoea / Stomach ache / Other |
| Month and year of birth                                                |                                                                                                                                                                                                                                                                                                                  |
| City code of living and work/school place                              |                                                                                                                                                                                                                                                                                                                  |
| Main occupation                                                        |                                                                                                                                                                                                                                                                                                                  |
| Main job                                                               |                                                                                                                                                                                                                                                                                                                  |
| Level of education                                                     |                                                                                                                                                                                                                                                                                                                  |
| Daily contacts with groups of people (patients, children, elderly)     |                                                                                                                                                                                                                                                                                                                  |
| Composition of the household                                           |                                                                                                                                                                                                                                                                                                                  |
| Child going to day-care?                                               |                                                                                                                                                                                                                                                                                                                  |
| Mean of transportation                                                 |                                                                                                                                                                                                                                                                                                                  |
| Daily time in public transports                                        | Location when symptoms started                                                                                                                                                                                                                                                                                   |
| Frequency of flu/cold                                                  | Date of onset                                                                                                                                                                                                                                                                                                    |
| Opinion about vaccination                                              | Date of the end of the symptoms                                                                                                                                                                                                                                                                                  |
| Reception of a vaccination voucher                                     | Did symptoms develop suddenly?                                                                                                                                                                                                                                                                                   |
| Size and weight                                                        | Date of the beginning of the fever                                                                                                                                                                                                                                                                               |
| Vaccination against seasonal influenza this year and the previous year | Did fever develop suddenly?                                                                                                                                                                                                                                                                                      |
|                                                                        | Highest temperature measured                                                                                                                                                                                                                                                                                     |
| Date of vaccination                                                    | See or phone a GP / medical service                                                                                                                                                                                                                                                                              |
| Raisons for vaccination or non-vaccination                             | When did you see or phone a GP / medical service?                                                                                                                                                                                                                                                                |
| Regular medication                                                     | Did you search info on the Internet?                                                                                                                                                                                                                                                                             |
| Pregnancy                                                              | Hospitalisation                                                                                                                                                                                                                                                                                                  |
| Smoking                                                                | Medication                                                                                                                                                                                                                                                                                                       |
| Respiratory allergies                                                  | Prescription or auto-medication                                                                                                                                                                                                                                                                                  |
| Taking preventive homeopathy                                           | Did you change your routine?                                                                                                                                                                                                                                                                                     |
| Pets at home                                                           | Off work / school                                                                                                                                                                                                                                                                                                |
| How did you know the study?                                            | Supposed origin of the symptoms (perception)                                                                                                                                                                                                                                                                     |

**Supplementary Text S1** – Individuals targeted by influenza vaccination in France in 2012-2013, according to French health authorities

- Age  $\geq$  65
- Pregnancy (at any trimester)
- Obesity (BMI  $\geq$  40)
- Broncho-pulmonary disorder (including asthma)
- Severe cardiac disease
- Chronic renal disease
- Sickle cell disease / thalassemia
- Diabetes mellitus
- Severe neurological or neuromuscular condition
- Paraplegia or tetraplegia affecting diaphragm
- Any immune disorder (HIV infection, immunosuppressive drugs, cancer...)
- Household contact of at-risk newborn
- Living in a social health-care institution

**Supplementary Figure S1 – Weekly incidence rates of ILIs and positivity rates from virological sampling for the 2012-2013 influenza season**

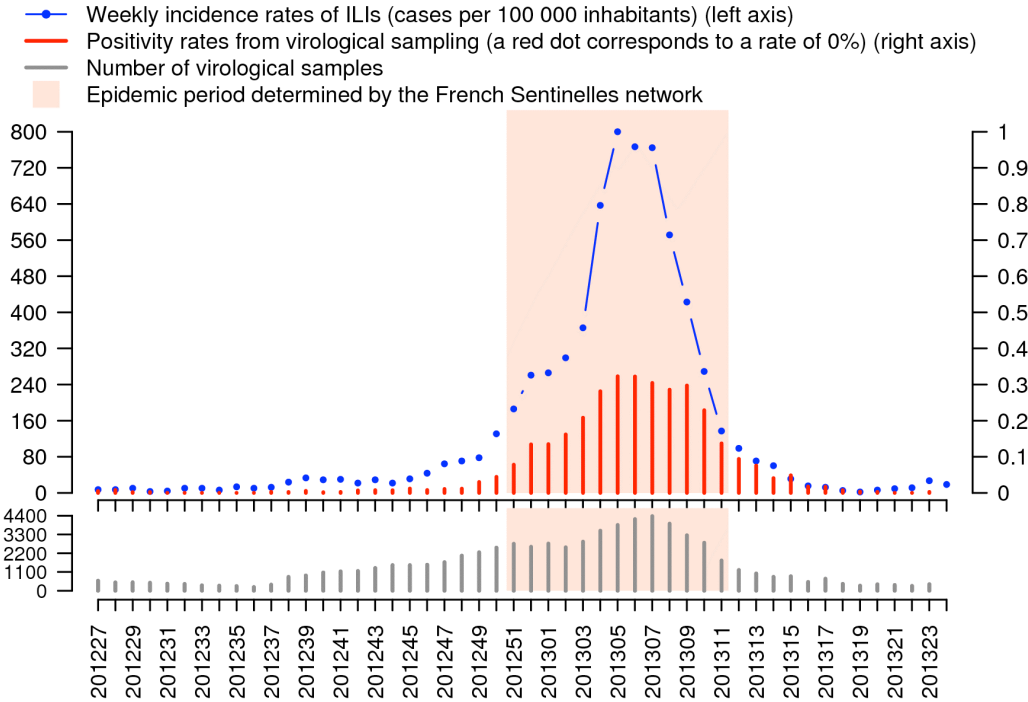

Weekly national incidence rates of ILI data (blue dashed line) were obtained from the French *Sentinelles* Network. ILI was defined as: sudden fever  $\geq 39^{\circ}\text{C}$  ( $102^{\circ}\text{F}$ ) with myalgia and respiratory signs. Weekly national proportions of confirmed influenza positive samples (virological data, red bar plot) data were downloaded from WHO-FluNet, and came from the French National Reference Centre for influenza (cell culture or PCR test, all influenza virus combined), for France (excluding overseas territories). The grey bar plot at the bottom of the graph corresponds to the number of virological samples analysed per week.
